# Supplementary material for: Identification of Biomarkers Associated with Liver Metastasis Progression from Colorectal Cancer Using Exosomal RNA Profiling
Source: MDPI journal article supplement (doi:10.3390/cancers14194723), 2022-09-28

Figures S1. Progression free survival by in exosome and GSE 41258 by CXCL10, CXCL11 in mCRC with liver metastasis

Exosome

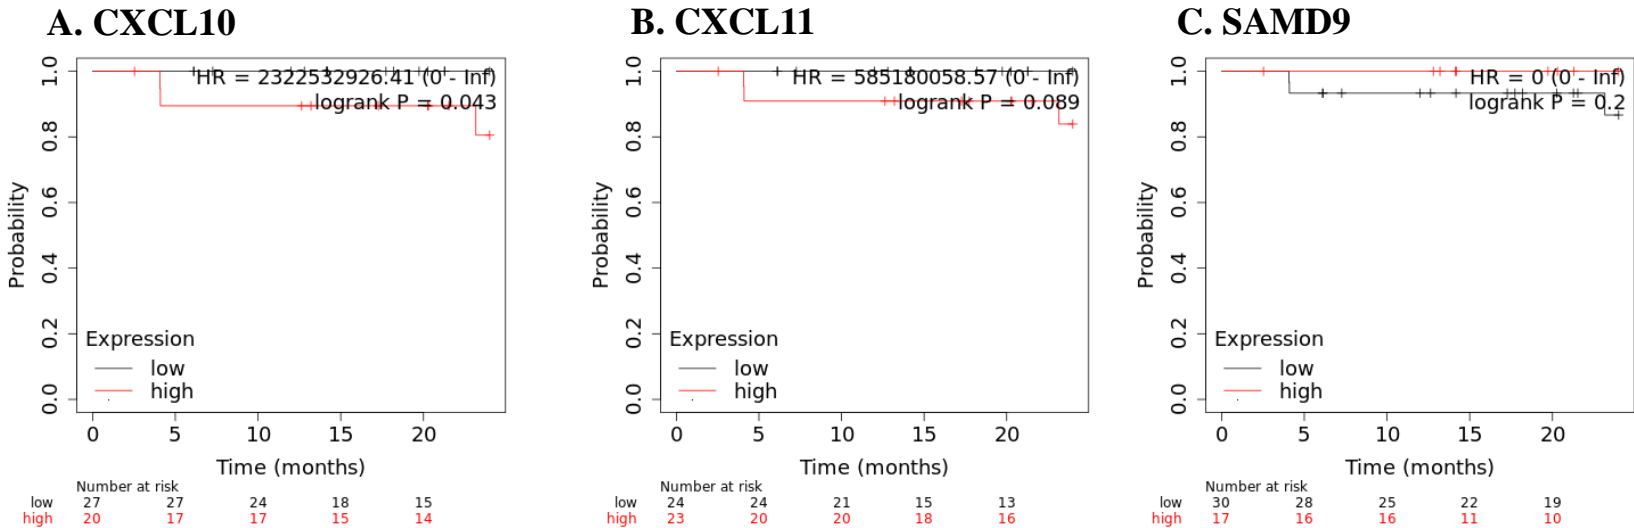

GSE 41258

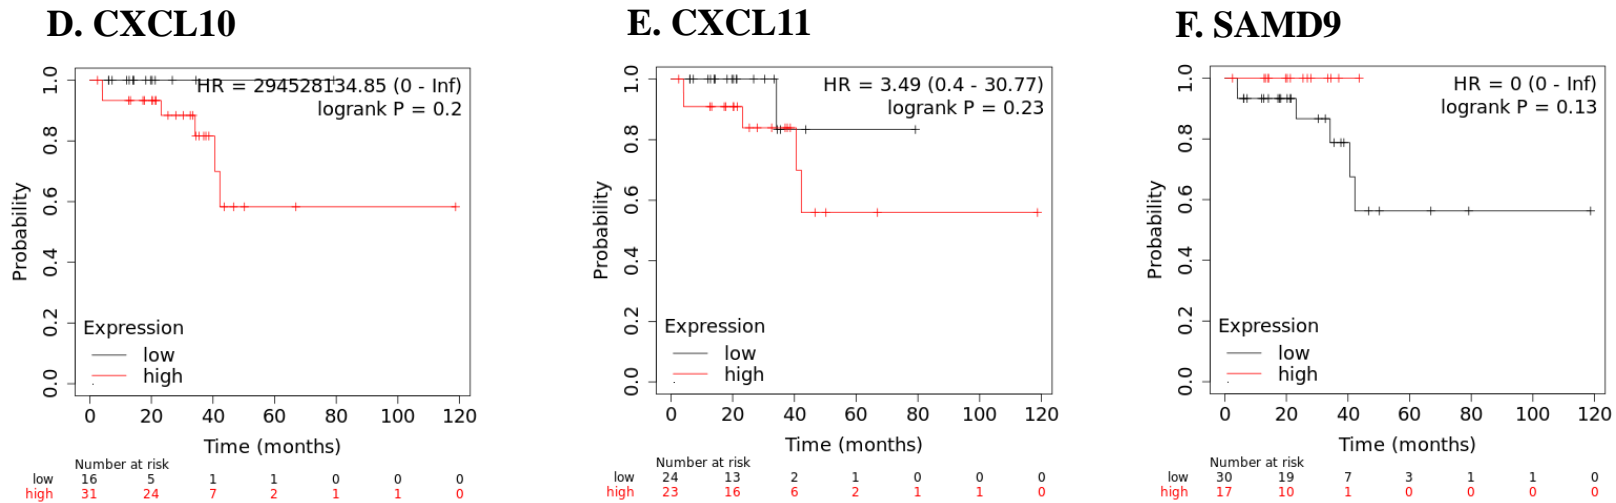

Supplement: s1 [file s1]
